# Supplementary material for: Molecular heterometallic hydride clusters composed of rare-earth and d-transition metals
Source: Springer Nature journal article supplement (doi:10.1038/nchem.1147), 2011-09-16
Supplement: 41557_2011_BFnchem1147_MOESM10_ESM.mol [file 41557_2011_BFnchem1147_MOESM10_ESM.mol]

  ChemDraw09021106182D

 82 65  0  0  0  0  0  0  0  0999 V2000
    0.0838    1.7740    0.0000 Mo  0  0  0  0  0  0  0  0  0  0  0  0
   -1.4456    2.5292    0.0000 P   0  0  0  0  0  0  0  0  0  0  0  0
   -1.7278    1.7510    0.0000 C   0  0  0  0  0  0  0  0  0  0  0  0
   -1.9630    3.1755    0.0000 C   0  0  0  0  0  0  0  0  0  0  0  0
   -0.6621    2.7962    0.0000 C   0  0  0  0  0  0  0  0  0  0  0  0
    1.4416    1.3799    0.0000 H   0  5  0  0  0  0  0  0  0  0  0  0
   -0.5416    0.8840    0.0000 H   0  5  0  0  0  0  0  0  0  0  0  0
   -1.2935    1.4360    0.0000 H   0  5  0  0  0  0  0  0  0  0  0  0
    0.6296    0.9306    0.0000 H   0  5  0  0  0  0  0  0  0  0  0  0
    1.7609    0.2081    0.0000 Dy  0  1  0  0  0  0  0  0  0  0  0  0
    1.2110   -0.8965    0.0000 H   0  5  0  0  0  0  0  0  0  0  0  0
    0.0187   -0.3401    0.0000 H   0  5  0  0  0  0  0  0  0  0  0  0
   -0.9111   -0.8411    0.0000 H   0  5  0  0  0  0  0  0  0  0  0  0
    1.4302   -2.1996    0.0000 H   0  5  0  0  0  0  0  0  0  0  0  0
   -0.4487   -1.4853    0.0000 Dy  0  1  0  0  0  0  0  0  0  0  0  0
   -1.5284   -1.3119    0.0000 H   0  5  0  0  0  0  0  0  0  0  0  0
    1.8207   -1.1062    0.0000 H   0  5  0  0  0  0  0  0  0  0  0  0
    0.7152   -1.5865    0.0000 Dy  0  1  0  0  0  0  0  0  0  0  0  0
    2.5282    0.9732    0.0000 C   0  0  0  0  0  0  0  0  0  0  0  0
    2.8270    0.2012    0.0000 C   0  0  0  0  0  0  0  0  0  0  0  0
    3.6535    0.2469    0.0000 C   0  0  0  0  0  0  0  0  0  0  0  0
    3.8655    1.0471    0.0000 C   0  0  0  0  0  0  0  0  0  0  0  0
    3.1700    1.4960    0.0000 C   0  5  0  0  0  0  0  0  0  0  0  0
    3.1245    2.3197    0.0000 Si  0  0  0  0  0  0  0  0  0  0  0  0
    2.3883    2.6921    0.0000 C   0  0  0  0  0  0  0  0  0  0  0  0
    3.8151    2.7710    0.0000 C   0  0  0  0  0  0  0  0  0  0  0  0
    3.0789    3.1434    0.0000 C   0  0  0  0  0  0  0  0  0  0  0  0
    4.1746   -0.3928    0.0000 C   0  0  0  0  0  0  0  0  0  0  0  0
    4.6349    1.3449    0.0000 C   0  0  0  0  0  0  0  0  0  0  0  0
    2.3797   -0.4920    0.0000 C   0  0  0  0  0  0  0  0  0  0  0  0
    1.7307    1.1844    0.0000 C   0  0  0  0  0  0  0  0  0  0  0  0
   -3.9334    0.6971    0.0000 C   0  0  0  0  0  0  0  0  0  0  0  0
   -3.6674   -0.0868    0.0000 C   0  0  0  0  0  0  0  0  0  0  0  0
   -2.8396   -0.0759    0.0000 C   0  0  0  0  0  0  0  0  0  0  0  0
   -2.5942    0.7146    0.0000 C   0  0  0  0  0  0  0  0  0  0  0  0
   -3.2702    1.1924    0.0000 C   0  5  0  0  0  0  0  0  0  0  0  0
   -3.2810    2.0173    0.0000 Si  0  0  0  0  0  0  0  0  0  0  0  0
   -4.0008    2.4204    0.0000 C   0  0  0  0  0  0  0  0  0  0  0  0
   -2.5720    2.4391    0.0000 C   0  0  0  0  0  0  0  0  0  0  0  0
   -3.2918    2.8422    0.0000 C   0  0  0  0  0  0  0  0  0  0  0  0
   -2.3460   -0.7370    0.0000 C   0  0  0  0  0  0  0  0  0  0  0  0
   -1.8130    0.9798    0.0000 C   0  0  0  0  0  0  0  0  0  0  0  0
   -4.1435   -0.7605    0.0000 C   0  0  0  0  0  0  0  0  0  0  0  0
   -4.7213    0.9417    0.0000 C   0  0  0  0  0  0  0  0  0  0  0  0
   -2.3081   -3.7395    0.0000 C   0  0  0  0  0  0  0  0  0  0  0  0
   -1.5001   -3.9196    0.0000 C   0  0  0  0  0  0  0  0  0  0  0  0
   -1.0791   -3.2069    0.0000 C   0  0  0  0  0  0  0  0  0  0  0  0
   -1.6269   -2.5862    0.0000 C   0  0  0  0  0  0  0  0  0  0  0  0
   -2.3864   -2.9154    0.0000 C   0  5  0  0  0  0  0  0  0  0  0  0
   -3.0968   -2.4958    0.0000 Si  0  0  0  0  0  0  0  0  0  0  0  0
   -3.8153   -2.9012    0.0000 C   0  0  0  0  0  0  0  0  0  0  0  0
   -3.0886   -1.6709    0.0000 C   0  0  0  0  0  0  0  0  0  0  0  0
   -3.8071   -2.0763    0.0000 C   0  0  0  0  0  0  0  0  0  0  0  0
   -0.2578   -3.1288    0.0000 C   0  0  0  0  0  0  0  0  0  0  0  0
   -1.4474   -1.7810    0.0000 C   0  0  0  0  0  0  0  0  0  0  0  0
   -1.1720   -4.6766    0.0000 C   0  0  0  0  0  0  0  0  0  0  0  0
   -2.9266   -4.2854    0.0000 C   0  0  0  0  0  0  0  0  0  0  0  0
    2.5414   -2.1848    0.0000 C   0  0  0  0  0  0  0  0  0  0  0  0
    2.2094   -2.9431    0.0000 C   0  0  0  0  0  0  0  0  0  0  0  0
    2.8280   -3.4932    0.0000 C   0  0  0  0  0  0  0  0  0  0  0  0
    3.5423   -3.0748    0.0000 C   0  0  0  0  0  0  0  0  0  0  0  0
    3.3651   -2.2662    0.0000 C   0  5  0  0  0  0  0  0  0  0  0  0
    3.9133   -1.6497    0.0000 Si  0  0  0  0  0  0  0  0  0  0  0  0
    3.6535   -0.8667    0.0000 C   0  0  0  0  0  0  0  0  0  0  0  0
    4.7213   -1.8161    0.0000 C   0  0  0  0  0  0  0  0  0  0  0  0
    4.4615   -1.0331    0.0000 C   0  0  0  0  0  0  0  0  0  0  0  0
    2.7469   -4.3142    0.0000 C   0  0  0  0  0  0  0  0  0  0  0  0
    4.2980   -3.4056    0.0000 C   0  0  0  0  0  0  0  0  0  0  0  0
    1.4035   -3.1197    0.0000 C   0  0  0  0  0  0  0  0  0  0  0  0
    2.1244   -1.4729    0.0000 C   0  0  0  0  0  0  0  0  0  0  0  0
    0.6099    3.8836    0.0000 C   0  0  0  0  0  0  0  0  0  0  0  0
    0.4325    3.0751    0.0000 C   0  0  0  0  0  0  0  0  0  0  0  0
    1.1467    2.6565    0.0000 C   0  0  0  0  0  0  0  0  0  0  0  0
    1.7654    3.2064    0.0000 C   0  0  0  0  0  0  0  0  0  0  0  0
    1.4337    3.9648    0.0000 C   0  5  0  0  0  0  0  0  0  0  0  0
    1.8508    4.6766    0.0000 C   0  0  0  0  0  0  0  0  0  0  0  0
    1.2276    1.8355    0.0000 C   0  0  0  0  0  0  0  0  0  0  0  0
    2.5713    3.0296    0.0000 C   0  0  0  0  0  0  0  0  0  0  0  0
   -0.3233    2.7444    0.0000 C   0  0  0  0  0  0  0  0  0  0  0  0
    0.0619    4.5003    0.0000 C   0  0  0  0  0  0  0  0  0  0  0  0
   -1.6273    0.2338    0.0000 Dy  0  1  0  0  0  0  0  0  0  0  0  0
   -0.9667   -2.1310    0.0000 H   0  5  0  0  0  0  0  0  0  0  0  0
  2  3  1  0      
  2  4  1  0      
  2  5  1  0      
 19 20  2  0      
 20 21  1  0      
 21 22  2  0      
 22 23  1  0      
 23 19  1  0      
 23 24  1  0      
 24 25  1  0      
 24 26  1  0      
 24 27  1  0      
 21 28  1  0      
 22 29  1  0      
 20 30  1  0      
 19 31  1  0      
 32 33  2  0      
 33 34  1  0      
 34 35  2  0      
 35 36  1  0      
 36 32  1  0      
 36 37  1  0      
 37 38  1  0      
 37 39  1  0      
 37 40  1  0      
 34 41  1  0      
 35 42  1  0      
 33 43  1  0      
 32 44  1  0      
 45 46  2  0      
 46 47  1  0      
 47 48  2  0      
 48 49  1  0      
 49 45  1  0      
 49 50  1  0      
 50 51  1  0      
 50 52  1  0      
 50 53  1  0      
 47 54  1  0      
 48 55  1  0      
 46 56  1  0      
 45 57  1  0      
 58 59  2  0      
 59 60  1  0      
 60 61  2  0      
 61 62  1  0      
 62 58  1  0      
 62 63  1  0      
 63 64  1  0      
 63 65  1  0      
 63 66  1  0      
 60 67  1  0      
 61 68  1  0      
 59 69  1  0      
 58 70  1  0      
 71 72  2  0      
 72 73  1  0      
 73 74  2  0      
 74 75  1  0      
 75 71  1  0      
 75 76  1  0      
 73 77  1  0      
 74 78  1  0      
 72 79  1  0      
 71 80  1  0      
M  CHG  8   1   4   6  -1   7  -1   8  -1   9  -1  10   3  11  -1  12  -1
M  CHG  8  13  -1  14  -1  15   3  16  -1  17  -1  18   3  23  -1  36  -1
M  CHG  5  49  -1  62  -1  75  -1  81   3  82  -1
M  END
