# Supplementary material for: Molecular heterometallic hydride clusters composed of rare-earth and d-transition metals
Source: Springer Nature journal article supplement (doi:10.1038/nchem.1147), 2011-09-16
Supplement: 41557_2011_BFnchem1147_MOESM25_ESM.mol [file 41557_2011_BFnchem1147_MOESM25_ESM.mol]

  ChemDraw09021106182D

 78 62  0  0  0  0  0  0  0  0999 V2000
   -1.6996   -0.7700    0.0000 H   0  5  0  0  0  0  0  0  0  0  0  0
    0.0639    1.7160    0.0000 Mo  0  0  0  0  0  0  0  0  0  0  0  0
   -1.1289   -1.3761    0.0000 H   0  5  0  0  0  0  0  0  0  0  0  0
    1.1352    1.1486    0.0000 H   0  5  0  0  0  0  0  0  0  0  0  0
    1.6023    1.4521    0.0000 H   0  5  0  0  0  0  0  0  0  0  0  0
    0.0578    0.4992    0.0000 H   0  5  0  0  0  0  0  0  0  0  0  0
   -1.7473    0.4456    0.0000 Ho  0  1  0  0  0  0  0  0  0  0  0  0
    1.9253   -0.6920    0.0000 H   0  5  0  0  0  0  0  0  0  0  0  0
   -0.8670    1.1174    0.0000 H   0  5  0  0  0  0  0  0  0  0  0  0
   -1.2573    1.5984    0.0000 H   0  5  0  0  0  0  0  0  0  0  0  0
    0.4931   -0.9128    0.0000 Ho  0  1  0  0  0  0  0  0  0  0  0  0
    1.3001   -1.5112    0.0000 H   0  5  0  0  0  0  0  0  0  0  0  0
   -0.4330   -0.9001    0.0000 Ho  0  1  0  0  0  0  0  0  0  0  0  0
   -0.8329   -0.4755    0.0000 H   0  5  0  0  0  0  0  0  0  0  0  0
    1.1362   -0.4857    0.0000 H   0  5  0  0  0  0  0  0  0  0  0  0
    1.9011    0.4220    0.0000 Ho  0  1  0  0  0  0  0  0  0  0  0  0
    3.0596    0.9723    0.0000 C   0  0  0  0  0  0  0  0  0  0  0  0
    3.2755    0.1732    0.0000 C   0  0  0  0  0  0  0  0  0  0  0  0
    4.1023    0.1316    0.0000 C   0  0  0  0  0  0  0  0  0  0  0  0
    4.3973    0.9051    0.0000 C   0  0  0  0  0  0  0  0  0  0  0  0
    3.7528    1.4246    0.0000 C   0  5  0  0  0  0  0  0  0  0  0  0
    3.7942    2.2486    0.0000 Si  0  0  0  0  0  0  0  0  0  0  0  0
    3.1014    2.6964    0.0000 C   0  0  0  0  0  0  0  0  0  0  0  0
    4.5285    2.6247    0.0000 C   0  0  0  0  0  0  0  0  0  0  0  0
    3.8356    3.0725    0.0000 C   0  0  0  0  0  0  0  0  0  0  0  0
    4.5531   -0.5593    0.0000 C   0  0  0  0  0  0  0  0  0  0  0  0
    5.1937    1.1203    0.0000 C   0  0  0  0  0  0  0  0  0  0  0  0
    2.7577   -0.4691    0.0000 C   0  0  0  0  0  0  0  0  0  0  0  0
    2.2887    1.2663    0.0000 C   0  0  0  0  0  0  0  0  0  0  0  0
    1.9396   -1.9591    0.0000 C   0  0  0  0  0  0  0  0  0  0  0  0
    1.3654   -2.5554    0.0000 C   0  0  0  0  0  0  0  0  0  0  0  0
    1.7550   -3.2858    0.0000 C   0  0  0  0  0  0  0  0  0  0  0  0
    2.5700   -3.1409    0.0000 C   0  0  0  0  0  0  0  0  0  0  0  0
    2.6841   -2.3210    0.0000 C   0  5  0  0  0  0  0  0  0  0  0  0
    3.4120   -1.9327    0.0000 Si  0  0  0  0  0  0  0  0  0  0  0  0
    3.4397   -1.1082    0.0000 C   0  0  0  0  0  0  0  0  0  0  0  0
    4.1122   -2.3689    0.0000 C   0  0  0  0  0  0  0  0  0  0  0  0
    4.1399   -1.5444    0.0000 C   0  0  0  0  0  0  0  0  0  0  0  0
    1.3944   -4.0277    0.0000 C   0  0  0  0  0  0  0  0  0  0  0  0
    3.1642   -3.7132    0.0000 C   0  0  0  0  0  0  0  0  0  0  0  0
    0.5482   -2.4417    0.0000 C   0  0  0  0  0  0  0  0  0  0  0  0
    1.7952   -1.1469    0.0000 C   0  0  0  0  0  0  0  0  0  0  0  0
   -2.7529   -3.1719    0.0000 C   0  0  0  0  0  0  0  0  0  0  0  0
   -1.9876   -3.4873    0.0000 C   0  0  0  0  0  0  0  0  0  0  0  0
   -1.4511   -2.8568    0.0000 C   0  0  0  0  0  0  0  0  0  0  0  0
   -1.8849   -2.1518    0.0000 C   0  0  0  0  0  0  0  0  0  0  0  0
   -2.6895   -2.3465    0.0000 C   0  5  0  0  0  0  0  0  0  0  0  0
   -3.3178   -1.8119    0.0000 Si  0  0  0  0  0  0  0  0  0  0  0  0
   -4.0950   -2.0887    0.0000 C   0  0  0  0  0  0  0  0  0  0  0  0
   -3.1690   -1.0004    0.0000 C   0  0  0  0  0  0  0  0  0  0  0  0
   -3.9461   -1.2772    0.0000 C   0  0  0  0  0  0  0  0  0  0  0  0
   -0.6286   -2.9201    0.0000 C   0  0  0  0  0  0  0  0  0  0  0  0
   -1.5706   -1.3890    0.0000 C   0  0  0  0  0  0  0  0  0  0  0  0
   -1.7935   -4.2891    0.0000 C   0  0  0  0  0  0  0  0  0  0  0  0
   -3.4556   -3.6042    0.0000 C   0  0  0  0  0  0  0  0  0  0  0  0
   -4.4012    0.7009    0.0000 C   0  0  0  0  0  0  0  0  0  0  0  0
   -4.1199   -0.0776    0.0000 C   0  0  0  0  0  0  0  0  0  0  0  0
   -3.2926   -0.0507    0.0000 C   0  0  0  0  0  0  0  0  0  0  0  0
   -3.0625    0.7445    0.0000 C   0  0  0  0  0  0  0  0  0  0  0  0
   -3.7477    1.2090    0.0000 C   0  5  0  0  0  0  0  0  0  0  0  0
   -3.7745    2.0336    0.0000 Si  0  0  0  0  0  0  0  0  0  0  0  0
   -4.5020    2.4226    0.0000 C   0  0  0  0  0  0  0  0  0  0  0  0
   -3.0738    2.4691    0.0000 C   0  0  0  0  0  0  0  0  0  0  0  0
   -3.8013    2.8581    0.0000 C   0  0  0  0  0  0  0  0  0  0  0  0
   -2.7862   -0.7020    0.0000 C   0  0  0  0  0  0  0  0  0  0  0  0
   -2.2866    1.0248    0.0000 C   0  0  0  0  0  0  0  0  0  0  0  0
   -4.5829   -0.7605    0.0000 C   0  0  0  0  0  0  0  0  0  0  0  0
   -5.1937    0.9302    0.0000 C   0  0  0  0  0  0  0  0  0  0  0  0
   -0.0129    3.6131    0.0000 C   0  0  0  0  0  0  0  0  0  0  0  0
   -0.8405    3.5983    0.0000 C   0  0  0  0  0  0  0  0  0  0  0  0
   -1.0822    2.8066    0.0000 C   0  0  0  0  0  0  0  0  0  0  0  0
   -0.4039    2.3321    0.0000 C   0  0  0  0  0  0  0  0  0  0  0  0
    0.2570    2.8305    0.0000 C   0  5  0  0  0  0  0  0  0  0  0  0
    1.0460    2.5897    0.0000 C   0  0  0  0  0  0  0  0  0  0  0  0
   -1.8621    2.5377    0.0000 C   0  0  0  0  0  0  0  0  0  0  0  0
   -0.3892    1.5072    0.0000 C   0  0  0  0  0  0  0  0  0  0  0  0
   -1.3373    4.2570    0.0000 C   0  0  0  0  0  0  0  0  0  0  0  0
    0.4601    4.2891    0.0000 C   0  0  0  0  0  0  0  0  0  0  0  0
 17 18  2  0      
 18 19  1  0      
 19 20  2  0      
 20 21  1  0      
 21 17  1  0      
 21 22  1  0      
 22 23  1  0      
 22 24  1  0      
 22 25  1  0      
 19 26  1  0      
 20 27  1  0      
 18 28  1  0      
 17 29  1  0      
 30 31  2  0      
 31 32  1  0      
 32 33  2  0      
 33 34  1  0      
 34 30  1  0      
 34 35  1  0      
 35 36  1  0      
 35 37  1  0      
 35 38  1  0      
 32 39  1  0      
 33 40  1  0      
 31 41  1  0      
 30 42  1  0      
 43 44  2  0      
 44 45  1  0      
 45 46  2  0      
 46 47  1  0      
 47 43  1  0      
 47 48  1  0      
 48 49  1  0      
 48 50  1  0      
 48 51  1  0      
 45 52  1  0      
 46 53  1  0      
 44 54  1  0      
 43 55  1  0      
 56 57  2  0      
 57 58  1  0      
 58 59  2  0      
 59 60  1  0      
 60 56  1  0      
 60 61  1  0      
 61 62  1  0      
 61 63  1  0      
 61 64  1  0      
 58 65  1  0      
 59 66  1  0      
 57 67  1  0      
 56 68  1  0      
 69 70  2  0      
 70 71  1  0      
 71 72  2  0      
 73 69  1  0      
 73 74  1  0      
 71 75  1  0      
 72 76  1  0      
 70 77  1  0      
 69 78  1  0      
 72 73  1  0      
M  CHG  8   1  -1   2   4   3  -1   4  -1   5  -1   6  -1   7   3   8  -1
M  CHG  8   9  -1  10  -1  11   3  12  -1  13   3  14  -1  15  -1  16   3
M  CHG  5  21  -1  34  -1  47  -1  60  -1  73  -1
M  END
